# Supplementary material
Source: HighWire-hosted journal article supplement (https://cmajopen.ca/highwire/filestream/81259/field_highwire_adjunct_files/1/2018-0097-2-at.pdf)
Supplement: 2018-0097-2-at.pdf [file 2018-0097-2-at.pdf]

**Appendix 2** (as supplied by the authors): Temporal trends in location of death and receipt of palliative care

Figure A1: Temporal trends in location of death stratified by chronic condition: Ontario 2004 –2014

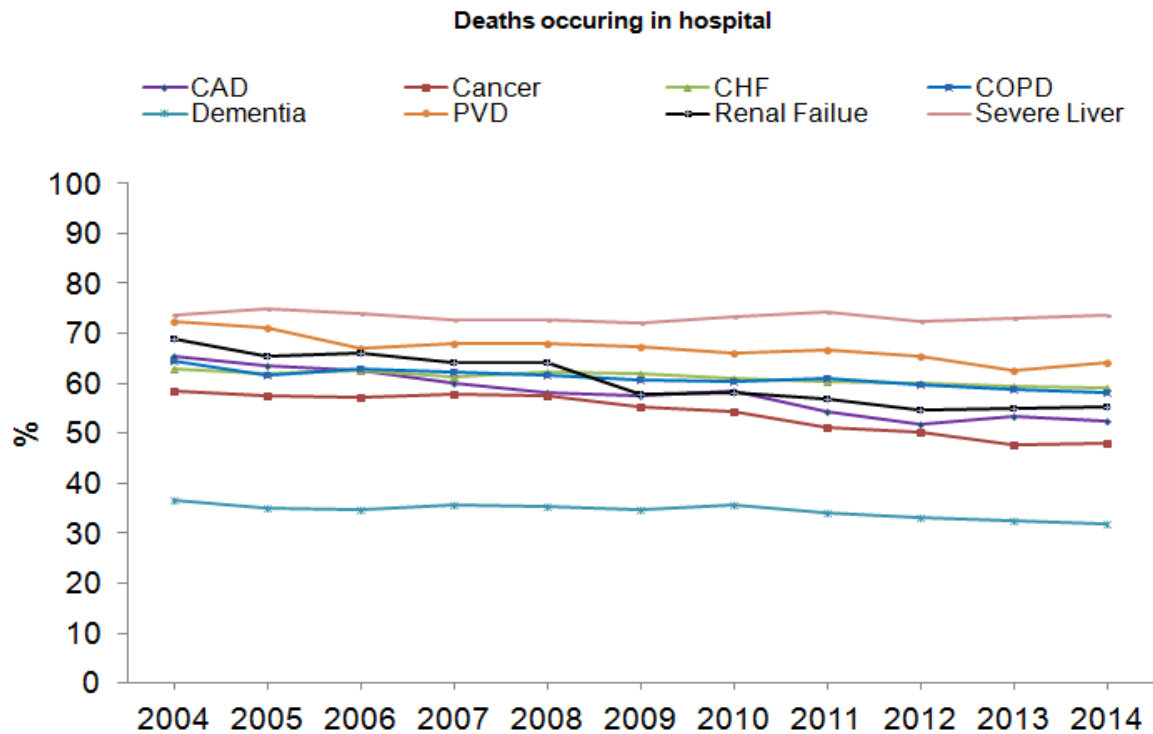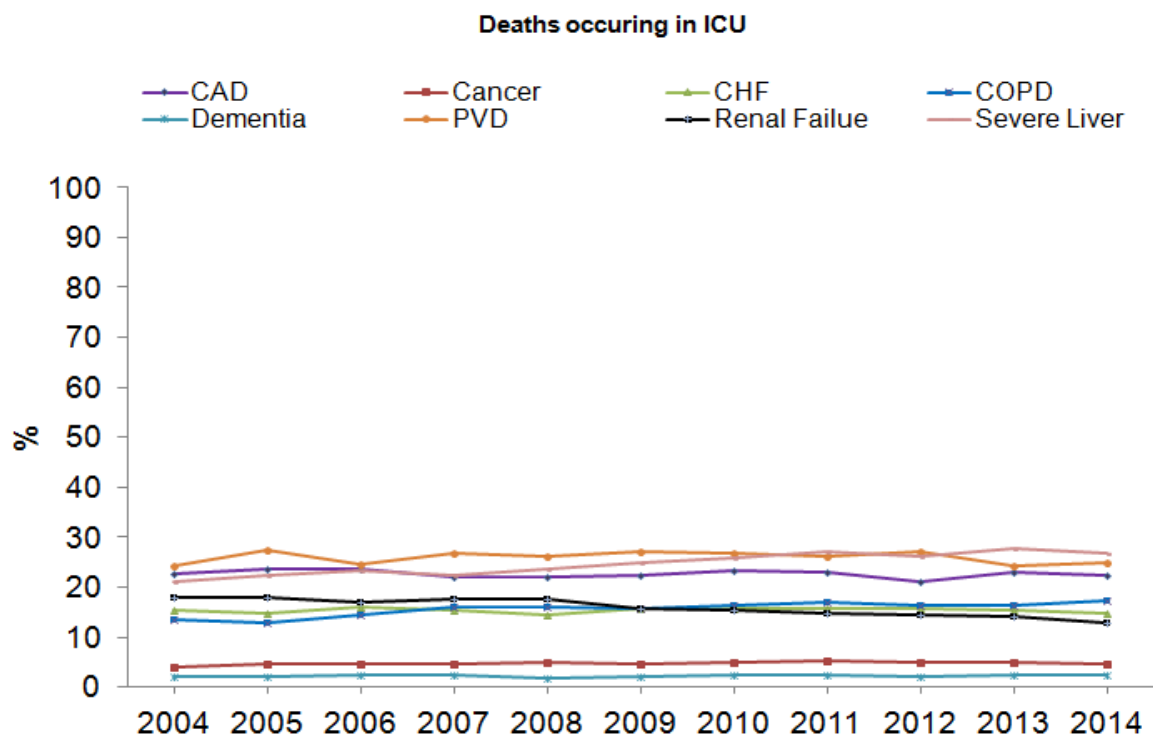

**Deaths occurring in hospital, with palliative care**

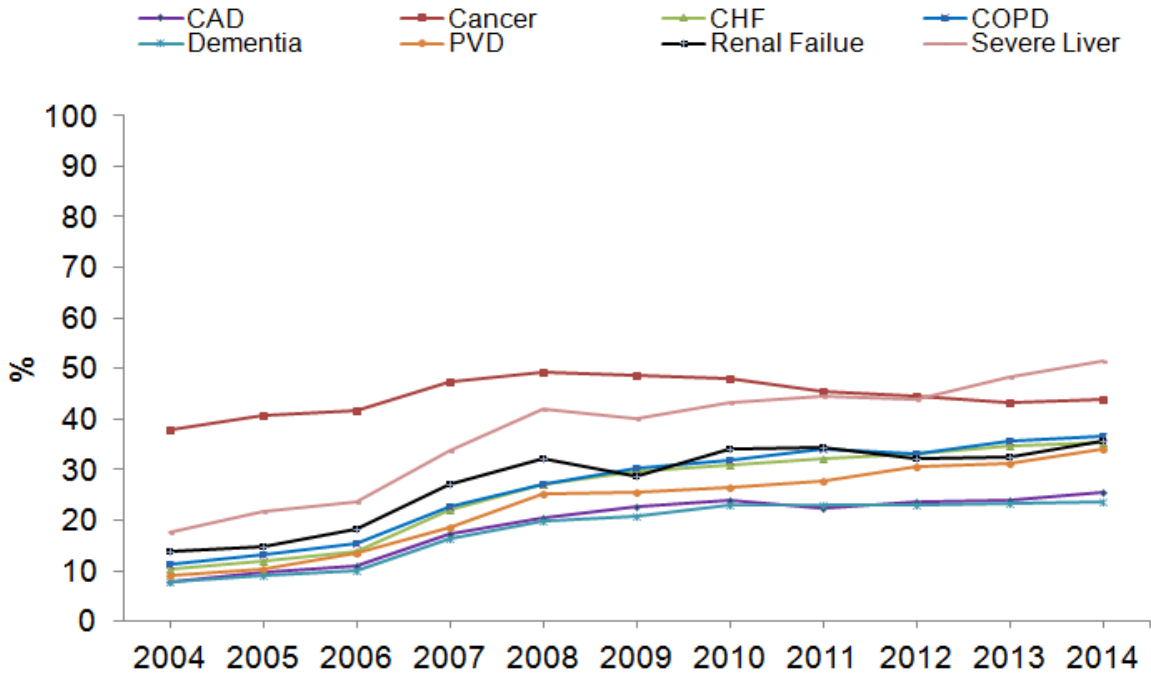

**Deaths occurring at home**

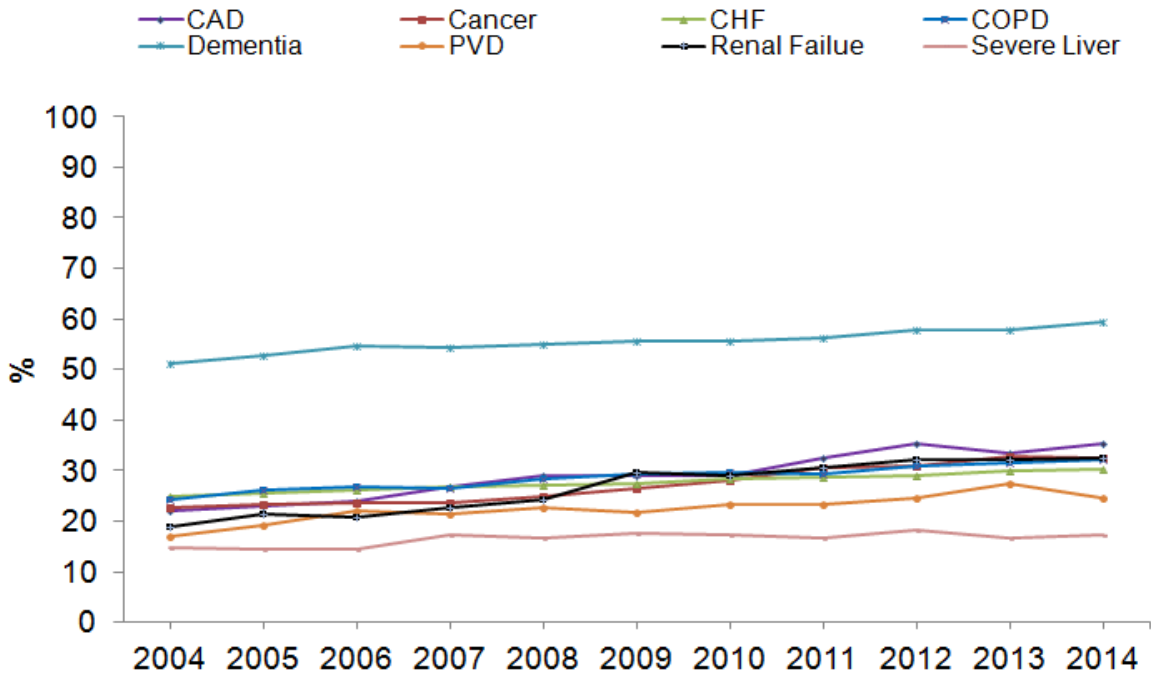

CAD – coronary artery disease; CHF – congestive heart failure; COPD – chronic obstructive pulmonary disease; PVD – peripheral vascular disease;

Figure A2: Receipt of palliative care during the terminal hospitalization among decedents dying in hospital: overall and by chronic condition

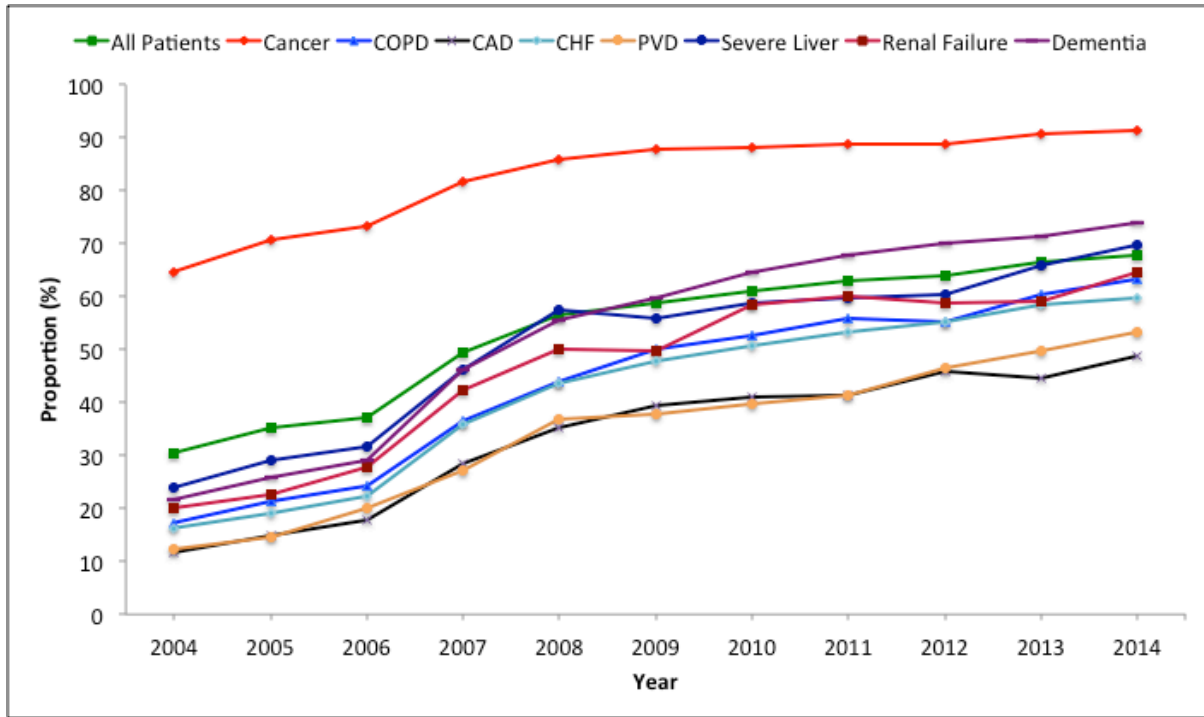

CAD – coronary artery disease; CHF – congestive heart failure; COPD – chronic obstructive pulmonary disease; PVD – peripheral vascular disease;
